# Supplementary material
Source: HighWire-hosted journal article supplement (https://sit.bmj.com/highwire/filestream/539/field_highwire_adjunct_files/3/bmjsit-2022-000156supp004_data_supplement.pdf)
Supplement: bmjsit-2022-000156supp004_data_supplement.pdf [file bmjsit-2022-000156supp004_data_supplement.pdf]

Supplementary Table 4: Uretrography

| Ref. No. | Author   | Country         | Journal                        | Year | Study design  | Patient selection                                                                   |                                                                                                              | Imaging techniques |                                                                                                                                                 |                                                                                                                                                       |                                                                                                                             | Endpoint measures                     |                                                                                                                                 |                                                                                                                                                                              |                                                                                                                                                                                   |                                                                         |                                                                                                                                                                                                                                                          |                 |                                                                  |                                                                                                                        |                                                                                                                                                                   |
|----------|----------|-----------------|--------------------------------|------|---------------|-------------------------------------------------------------------------------------|--------------------------------------------------------------------------------------------------------------|--------------------|-------------------------------------------------------------------------------------------------------------------------------------------------|-------------------------------------------------------------------------------------------------------------------------------------------------------|-----------------------------------------------------------------------------------------------------------------------------|---------------------------------------|---------------------------------------------------------------------------------------------------------------------------------|------------------------------------------------------------------------------------------------------------------------------------------------------------------------------|-----------------------------------------------------------------------------------------------------------------------------------------------------------------------------------|-------------------------------------------------------------------------|----------------------------------------------------------------------------------------------------------------------------------------------------------------------------------------------------------------------------------------------------------|-----------------|------------------------------------------------------------------|------------------------------------------------------------------------------------------------------------------------|-------------------------------------------------------------------------------------------------------------------------------------------------------------------|
|          |          |                 |                                |      |               | Subject                                                                             | N (cases)                                                                                                    | Fluorogenic agent  | Dose                                                                                                                                            | Route                                                                                                                                                 | Timing                                                                                                                      | Imaging system                        | Quantitative measurement                                                                                                        | Main endpoints                                                                                                                                                               | Imaging accuracy/success rate                                                                                                                                                     | Clinical impact, changes in intraoperative decision-making and outcomes | Clinical impact, advantages in postoperative outcomes                                                                                                                                                                                                    | Adverse effects | Learnin g curve                                                  | Cost analysis                                                                                                          | Other comments                                                                                                                                                    |
| 1        | Verbeek  | The Netherlands | J Urol                         | 2013 | Prospective   | Gynaecology and urology patients undergoing open pelvic surgery                     | 12                                                                                                           | Methylene blue     | 0.25-1mg/kg                                                                                                                                     | IV                                                                                                                                                    | After exposure of the ureters as part of the pelvic dissection. Imaging was performed for up to 60 minutes after injection. | NIR imaging using Mini-FLARE system   | Fluorescence intensity                                                                                                          | Visualization of the ureters                                                                                                                                                 | 100%<br>The mean signal-to-background ratio of the ureter was 2.27 ± 1.22 (N = 4), 2.61 ± 1.88 (N = 4) and 3.58 ± 3.36 (N = 4) for the 0.25, 0.5 and 1 mg/kg doses, respectively. | NA                                                                      | NA                                                                                                                                                                                                                                                       | None            | NA                                                               | NA                                                                                                                     | Verbeek FV, van der Voort JR, Schaafsma BE, Swijnenburg RJ, Garenstroom KN, Elzevier HW, van de Velde CJ, Franconi JV, Valkenburg AL, J Urol. 2013; 189(7):1474-9 |
| 2        | Lee      | US              | Urology                        | 2013 | Retrospective | Robot-assisted ureteroureterostomy                                                  | 7                                                                                                            | ICG                | 25 mg in 10 ml, distilled water                                                                                                                 | Ureteral catheter or percutaneous nephrostomy tube or both                                                                                            | After insertion of the catheter or at the time of retrograde pyelography                                                    | NIR modality on da Vinci Si           | NA                                                                                                                              | Localize ureteral stenosis in real time; real-time delineation of the ureter and discernment of healthy from diseased tissue                                                 | 100%                                                                                                                                                                              | Tension-free anastomosis was achieved in all 7 patients                 | No evidence of stricture recurrence at follow-up                                                                                                                                                                                                         | None            | NA                                                               | Lee Z, Simhan J, Parker DC, Reilly C, Oshro G, et al. Urology. 2013 Sep;82(3):729-33                                   |                                                                                                                                                                   |
| 3        | Siddighi | US              | Am J Obstet Gynecol            | 2014 | Prospective   | Robot-assisted laparoscopic sacrosplasty                                            | > 10 (exact number not stated)                                                                               | ICG                | 25 mg in 10 ml, sterile water                                                                                                                   | Ureteral catheter (both sides)                                                                                                                        | Intermittently throughout the procedure                                                                                     | NIR modality on da Vinci Si           | NA                                                                                                                              | Localize the ureter intraoperatively to prevent anastomotic ureteral injury during pelvic surgery                                                                            | 100% (although there were some variations in brightness owing to the depth of the ureter from the peritoneal surface)                                                             | NA                                                                      | NA                                                                                                                                                                                                                                                       | None            | NA                                                               | \$100 for ICG                                                                                                          | Siddighi S, Yane JJ, Hurdley J, Am J Obstet Gynecol. 2014 Oct;211(4):436.e1-2                                                                                     |
| 4        | Lee      | US              | Eur Urol                       | 2015 | Retrospective | Robot-assisted ureteral reconstruction                                              | 26                                                                                                           | ICG                | 25 mg in 10 ml, sterile water                                                                                                                   | Ureteral catheter or percutaneous nephrostomy tube or both                                                                                            | After insertion of the catheter and when needed during the procedure to localize the margins of ureteral strictures         | NIR modality on da Vinci Si           | NA                                                                                                                              | Localize the margins of ureteral strictures                                                                                                                                  | 100%                                                                                                                                                                              | Imaging aided in successful performance of all 26 procedures            | No postoperative complications within 12 months of surgery                                                                                                                                                                                               | None            | NA                                                               | \$50 for ICG and 20 minutes of extra operating time                                                                    | Lee Z, Moore B, Gamo L, Eum DD, Eur Urol. 2015 Feb;67(2):291-8                                                                                                    |
| 5        | Lee      | US              | Korean J Urol                  | 2015 | Case report   | Robotic partial nephroureterectomy in a patient with complete ureteral triplication | 1                                                                                                            | ICG                | 25 mg in 10 ml, distilled water                                                                                                                 | Intraureteral (by catheter) and IV                                                                                                                    | After pyelography (intravenous) and after transecting the renal artery and vein (intravenous)                               | NIR modality on da Vinci Si           | NA                                                                                                                              | Facilitate real-time imaging of pathologic ureter and renal pelvis (intravenous) and to assess perfusion in the kidney and delineate diseased renal parenchyma (intravenous) | All endpoints of interest were identified successfully                                                                                                                            | NA                                                                      | NA                                                                                                                                                                                                                                                       | None            | NA                                                               | NA                                                                                                                     | Lee M, Lee Z, Eum D, Korean J Urol. 2015 Jun;56(6):473-6                                                                                                          |
| 6        | Al-Tajer | The Netherlands | J Laparoendosc Adv Surg Tech A | 2016 | Prospective   | Laparoscopic colorectal surgery                                                     | 10                                                                                                           | Methylene blue     | Between 0.125 and 1 mg/kg                                                                                                                       | IV                                                                                                                                                    | Preoperative (during administration of anesthesia) and before the first trocar                                              | Laparoscope with fluorescence imaging | Assess feasibility of imaging the ureter with methylene blue during laparoscopic colorectal surgery                             | Successful visualization in 5 of the 10 patients (50%)                                                                                                                       | NA                                                                                                                                                                                | NA                                                                      | None                                                                                                                                                                                                                                                     | NA              | NA                                                               | Al-Tajer M, van den Bosch J, Schols RM, Buijs ND, Staanen LP, J Laparoendosc Adv Surg Tech A. 2016 Nov;26(11):1870-875 |                                                                                                                                                                   |
| 7        | Yeung    | UK              | Ann Surg                       | 2016 | Case series   | Laparoscopic and open colorectal surgery                                            | 8 (6 laparoscopic and 2 open colorectal surgery)                                                             | Methylene blue     | Between 0.25 and 1 mg/kg at a concentration of 10 mg/ml                                                                                         | IV, slow infusion over 5 minutes                                                                                                                      | During surgery                                                                                                              | In-house device at 660 nm excitation  | Assess the feasibility of imaging the ureter with methylene blue and quantify the signal to background ratio for methylene blue | 10 of the 11 ureters were successfully visualized                                                                                                                            | The authors considered the methylene blue technique useful in only 4 of the patients; the methylene blue interfered with pulse oximetry readings                                  | NA                                                                      | None                                                                                                                                                                                                                                                     | NA              | 1 mg/ml methylene blue yielded the strongest fluorescence signal | Yeung TM, Volpi D, Tallis EJ, Nicholson GA, Buchs N, Cunningham C, et al. Ann Surg. 2016 Jun;263(1):e1-2               |                                                                                                                                                                   |
| 8        | Morozov  | Russia          | Urologia                       | 2017 | Case report   | Retropubic and lymph node dissection, partial nephrectomy, and ureterolysis         | 10 (4 retropubic and lymph node dissection procedures, 5 partial nephrectomy procedures, and 1 ureterolysis) | ICG                | 2.5 mg/mL, using 3-5 mL, except for retropubic and lymph node dissection procedures, and by injection into the renal pelvis during ureterolysis | Transretrocally (during retropubic procedure), intravenously (during partial nephrectomy), and by injection into the renal pelvis during ureterolysis | Immediately before retropubic and lymph node dissection, after surgery began for partial nephrectomy and ureterolysis       | SPY Elite (Novada)                    | NA                                                                                                                              | Assess the lymph nodes, differentiate tumor from parenchyma, and localize ureter strictures                                                                                  | Sensitivity was 100% and specificity was 73.3%                                                                                                                                    | NA                                                                      | NA                                                                                                                                                                                                                                                       | None            | NA                                                               | NA                                                                                                                     | Morozov AO, Aljavec YG, Rapoport LM, Taranchenko DG, Brzozko EA, Butaru DV, et al. Urologia. 2017 Aug 1;84(1):197-202                                             |
| 9        | Barnes   | UK              | Surg Endosc                    | 2018 | Prospective   | Elective colorectal surgery (laparoscopic or open)                                  | 42 (69 ureters)                                                                                              | Methylene blue     | Between 0.25 and 1 mg/kg at a concentration of 10 mg/mL                                                                                         | IV, slow infusion over 5 minutes                                                                                                                      | 10-15 minutes before the procedure                                                                                          | PINPOINT Deep Red laparoscopic system | Localize the ureter intraoperatively                                                                                            | 64 of the 69 ureters were visualized successfully (14 of these were not visible under white light)                                                                           | In 10 cases, imaging showed the ureter to be in a different place from the presumed location                                                                                      | NA                                                                      | None                                                                                                                                                                                                                                                     | NA              | \$90 for the methylene blue and the imaging system is expensive  | Barnes TG, Hennes R, Birk J, Mortenson NJ, Jones O, Lindsey L, et al. Surg Endosc. 2018 Sep;32(9):1603e-1604e3         |                                                                                                                                                                   |
| 10       | Lee      | US              | World J Urol                   | 2019 | Case series   | Robotic ureterocentric reimplantation (benign anastomotic strictures)               | 8 (10 procedures)                                                                                            | ICG                | 25 mg in 10 ml, distilled water                                                                                                                 | Injection antegrade and/or retrograde into the lumen of the ureter and retrograde into the lumen of the urinary diversion                             | Beginning of surgery                                                                                                        | NIR modality on da Vinci Si or Xi     | NA                                                                                                                              | Identify the structured ureter and urinary diversion and localize stenosis angina                                                                                            | Not reported (presumably 100%)                                                                                                                                                    | NA                                                                      | 3 of the 8 patients suffered a minor postoperative complication within 90 days of surgery; 2 of the 8 patients suffered a major postoperative complication within 90 days of surgery                                                                     | None            | NA                                                               | Lee Z, Sterling ME, Keshav AY, Lee M, Meno MI, Eum DD, World J Urol. 2019 Jun;37(6):1211-1216                          |                                                                                                                                                                   |
| 11       | Farnam   | US              | J Biomed Opt                   | 2019 | Prospective   | Hysterectomy                                                                        | 24                                                                                                           | IS-601             | 10, 20, or 40 mg                                                                                                                                | IV over 1 minute                                                                                                                                      | NA                                                                                                                          | NIR modality on da Vinci Si or Xi     | Ureter to background signal did not vary between dose groups                                                                    | Ureter visualization during hysterectomy                                                                                                                                     | Fluorescence varied even within dose groups but imaging was successful in all patients                                                                                            | NA                                                                      | 4 adverse events not typical of hysterectomy were observed in 2 subjects who received the lowest dose (10 mg); these events were deemed by the investigators not related to the dye (headache, neck pain, urinary tract infection, and device site pain) | None            | NA                                                               | NA                                                                                                                     | Farnam RW, Anns RG, Klasean AH, Sager JM. J Biomed Opt. 2019 Jun;24(6):1-8                                                                                        |

|    |       |       |                          |      |               |                                                 |    |                                         |                             |                                                                                  |                                                    |                                   |    |                                                                                                               |                                                                                                                                                                                                                                  |                                                                                                                                                                                                        |      |    |                             |                                                                                                |                                                                                                                                       |
|----|-------|-------|--------------------------|------|---------------|-------------------------------------------------|----|-----------------------------------------|-----------------------------|----------------------------------------------------------------------------------|----------------------------------------------------|-----------------------------------|----|---------------------------------------------------------------------------------------------------------------|----------------------------------------------------------------------------------------------------------------------------------------------------------------------------------------------------------------------------------|--------------------------------------------------------------------------------------------------------------------------------------------------------------------------------------------------------|------|----|-----------------------------|------------------------------------------------------------------------------------------------|---------------------------------------------------------------------------------------------------------------------------------------|
| 12 | Huh   | US    | J Minim Invasive Gynecol | 2020 | Prospective   | Minimally invasive (gynecologic) pelvic surgery | 41 | Neridocicaine                           | 0.06, 0.12, and 0.045 mg/kg | IV                                                                               | NA                                                 | PINPOINT system and AIM endoscope | NA | Image the ureter and compare imaging systems (degree of concordance between laparoscopic and robotic devices) | Visualization was successful in 88.9% of NA cases                                                                                                                                                                                | Vaginal hemorrhage, abdominal pain, nausea, constipation                                                                                                                                               | None | NA | NA                          | No difference in scores between the PINPOINT system and the AIM endoscope                      | Huh WK, Johnson JL, Elliott E, Hesse JD, Leath CA 3rd, Kour JL, et al. J Minim Invasive Gynecol. 2020 Jun 29;51531-4650;DOI:10.1023/X |
| 13 | Ryu   | Japan | Surg Oncol               | 2020 | Retrospective | Laparoscopic left-sided colon and rectal cancer | 59 | Near-infrared fluorescent resin and ICG | Not reported                | IV for ICG; the resin was incorporated into the clip and catheters               | NA                                                 | VISERA ELITE II (Olympus)         | NA | Determine usefulness of fluorescence imaging in surgeries involving colorectal cancer                         | Fluorescence of the resin-impregnated clip could not be observed in 1 case (the clip was probably hidden under a layer of fat); fluorescence was successful in all ICG cases. In 5 cases, the ICG data changed the surgical plan | No postoperative leakage or stoma necrosis occurred in the 5 cases where ICG changed the surgical plan; in other patients, there was 1 case of ureter injury and 1 case of abdominal abscess formation | None | NA | NA                          | Ryu S, Ishida K, Okamoto A, Nakashima K, Hara K, Ino R, et al. Surg Oncol. 2020 Dec;35:434-440 |                                                                                                                                       |
| 14 | White | US    | Colorectal Dis           | 2020 | Prospective   | Robot-assisted colorectal surgery               | 16 | ICG                                     | 5 mL of 2.5 mg/mL           | Ureteral catheter, with installation time of 4-21 minutes (median: 11.5 minutes) | After catheter advancement (no more details given) | da Vinci                          | NA | Identify the ureter to avoid it during surgery                                                                | 15 of 16 patients were successfully imaged (1 patient had severe inflammation in the area and so the ICG infiltrated the surrounding tissue)                                                                                     | 1 case of acute kidney injury and 1 case of prostatic bleeding, 3 cases of urinary tract infections within 1 month of surgery                                                                          | None | NA | \$100 for ICG per procedure | White LA, Joseph JP, Yang DY, Kelley SR, Mathis KL, Behm K, et al. Colorectal Dis. 2020 Oct 16 |                                                                                                                                       |

NA, Not available or not assessed
